# Supplementary material for: SARS-CoV-2 under an elimination strategy in Hong Kong
Source: PubMed Central journal article supplement — medRxiv. 2021 Jun 23:2021.06.19.21259169. Preprint. [Version 1] doi: 10.1101/2021.06.19.21259169 (PMC8240692; doi:10.1101/2021.06.19.21259169), 2021-06-23
Supplement: NIHPP2021.06.19.21259169v1-supplement-1.pdf [file NIHPP2021.06.19.21259169v1-supplement-1.pdf]

## Supplementary Materials

### Materials and Methods

#### SARS-CoV-2 data from Hong Kong

De-identified saliva or nasopharyngeal samples positive for SARS-CoV-2 by real time-polymerase chain reaction (RT-PCR), along with epidemiological information including onset date, report date and contact history for individual cases were obtained from the Centre for Health Protection, Hong Kong.

#### Genomic sequencing of SARS-CoV-2

A total of 1,753 laboratory-confirmed samples were collected from 1,733 RT-PCR confirmed cases from 22-June-2020 to 26-January-2021. Virus genome was reverse transcribed with primers targeting different regions of the viral genome, published in (22). The synthesized cDNA was then subjected to multiple overlapping 2kb PCRs for full-genome amplification. PCR amplicons obtained from the same specimen were pooled and sequenced using Nova sequencing platform (PE150, Illumina). Sequencing library was prepared by Nextera XT. The base calling of raw read signal and demultiplexing of reads by different samples were performed using Bcl2Fastq (Illumina). A reference-based re-sequencing strategy was applied in analyzing the NGS data. Specifically, the raw FASTQ reads were assembled and mapped to the SARS-CoV-2 reference genome (Wuhan-Hu-1, GenBank: MN908947.3) using BWA mem2 (v.2.0pre2) (23). The consensus sequences for each sample were called as dominant bases at each position by samtools mpileup (v.1.11) (24) with minimum depth of 100 reads. Samples less than 27kb in length (excluding gaps) were excluded from downstream analysis. The head and tail 100nt bases of all generated consensus sequences were masked. We also masked another 10 sites located in PCR primer binding regions and observed to be variant ( $\geq 3\%$  allele frequency) in 1% or more HK samples (**table S9**). The same masking strategy was also applied in phylodynamics analysis, variant calling, and bottleneck estimation. The average sequencing depth (number of mapped reads) at each nucleotide position that was retained ranged from  $\sim 10,000$  to  $\sim 100,000$  (**fig. S6**).

There were 16 patients from which samples were collected or sequenced at multiple time points. Twelve samples from 6 patients were sequenced in duplicate, and 21 samples from 10 patients were collected sequentially. One representative sample for each of the 16 patients was selected based on genome coverage and average sequencing depth. In total, 1,601 representative samples met quality control standards. All 1,601 consensus sequences from Hong Kong, as well as 298 additional consensus sequences from the first two waves were included in the phylogenetic analysis. Sequences from regions outside Hong Kong were retrieved from the GISAID database (total 399,124 sequences, accessed 16-February-2021, detailed accession numbers and acknowledgement information in **data S4**).

#### Phylogenetic analysis of SARS-CoV-2 in Hong Kong

Hong Kong sequences were analysed with a global SARS-CoV-2 genome alignment obtained from GISAID (accessed 16-February-2021). For each Hong Kong sequence, the three most similar global sequences (evaluated by p distance excluding gaps,  $n = 385$ ), as well as the earliest sampled sequence ( $n = 1,279$ ) from each PANGO lineage (accessed 07-May-2021) (11) were selected. After removing repetitive sequences and trimming masked sites, data quality was evaluated using a root-to-tip regression analysis in TempEst (v.1.5.3) (25), resulting in a final set of 3,437 sequences. Maximum likelihood (ML) phylogenies were estimated using IQ-TREE (v.2) (26), employing the best-fit nucleotide substitution model with Wuhan-Hu-1 (GenBank:

MN908947.3) as the outgroup and dated by least square dating (LSD2) (27). Branch support was estimated using ultrafast bootstrap approximation (UFBoot) and SH-like approximate likelihood ratio test (SH-aLRT), and for nodes of interest with <50% support, we examined their stability through multiple iterative runs using the best-fit nucleotide substitution model. Internal branches with zero-length were preserved for dating by setting parameter  $l$  as -1. SARS-CoV-2 sequences from Hong Kong were classified based on the dynamic PANGO nomenclature system (<https://github.com/cov-lineages/pangolin>, v.2.3.9, 23-April-2021) (11) and confirmed using a ML analysis.

### Phylodynamics of Hong Kong waves

To identify monophyletic clusters of SARS-CoV-2 lineages in Hong Kong, Bayesian molecular clock phylogenetic analysis pipeline proposed by Plessis *et al.* (28) were implemented. In this study, the data tree and starting tree were applied to a ML tree generated by IQ-TREE (v.2) (26) with LSD2 (27). Time-scaled phylogenies were generated using the strict clock model with 0.001 substitutions per site per year which is within 95% credible interval of SARS-CoV-2 temporal signal (29), the Skygrid model (30) with 61 grid points and a Laplace root-height prior with mean equal to the dated-ML tree estimated by IQ-TREE (v.2) (26) and scale is set to 20% of mean. To improve computational efficiency, two largest local monophyletic clades in wave three (HK-wave3,  $n = 902$ ) and wave four (HK-wave4A,  $n = 552$ ) from ML tree were subsampled to 100 and 65 sequences by 5 earliest cases, 5 latest cases and 10% of the remaining randomly selected, respectively. We ran nine MCMC chains of 100 million, sampling every 1,000 steps and discarding 10% as burn-in. As there are no collapsed internal branches in this study, only uncertainty in branch durations were estimated by MCMC. From the approach described in Geoghegan *et al.* (31), we used the R package “NELSI” (32) to identify classify all monophyletic lineages, including singletons, and to estimate the delay in lineage detection following importation as well as the duration of circulation, given a set of 8,000 posterior trees. It's notable that there are two global sequences from Japan (EPI\_ISL\_591420 and EPI\_ISL\_721612) present in the HK-wave3 clade. However, these two Japan cases had travel history to the Philippines (similar to the early HK-wave3 imported cases), and were quarantined when landed in Japan, suggesting that they are unlikely to have caused an introduction in Hong Kong. These two cases were therefore excluded when defining the HK-wave3 clade.

For all samples of HK-wave3 and HK-wave4A, we used the birth-death skyline serial (BDSS) model (14) implemented in BEAST (v.2.6.3) (33) to infer the time of origin (tOrigin), time of most recent common ancestor (tMRCA) and temporal variations (piecewise fashion over 12-15 equidistant intervals) in the effective reproductive number denoted as  $R_t$ . A non-informative prior for tOrigin was used with a the lower bound set to 1-January-2020. The HKY + G4 nucleotide substitution model and an uncorrelated relaxed molecular clock model with lognormal rate distribution (UCLN) (34) were used. The sampling proportion was given a uniform distribution as prior with the upper bound at the empirical ratio of the number of sequences to the number of reported cases. MCMC chains were run for 600 million and 800 million steps and sampled every 2,000 and 10,000 steps for the lineages HK-wave3 (B.1.1.63) and HK-wave4A (B.1.36.27) respectively, with the initial 10% discarded as burn-in. This resulted in a final total of 270,000 and 72,000 sampled states. Mixing of the MCMC chain was inspected using Tracer (v1.7.1) (35) to ensure an effective sample size (ESS) of >200 for each parameter. Change in the effective reproductive number over time after the estimated tMRCA was plotted using R package “bdskytools” (<https://github.com/laduplessis/bdskytools>). Since by definition there are no sequences between tMRCA and the estimated tOrigin, the effective

reproductive number ( $R_e$ ) was assumed to remain constant in this period. This assumption was incorporated in the default birth-death model using the package TreeSlicer in BEAST2.

#### Human mobility in Hong Kong using Octopus data

We used digital transactions made on Octopus cards, ubiquitously used by the Hong Kong population for daily public transport and small retail payments (<https://www.octopus.com.hk/tc/consumer/index.html>), to obtain changes in mobility during 2020–2021 among cards classified as children, students, adults and elderly (**fig. S5**).

#### Analysis of within-host genetic variation and transmission bottleneck

Deep sequencing SARS-CoV-2 samples in the United Kingdom and Austria has shown that the within-host genetic diversity (iSNV) is low with a narrow bottleneck during transmission (19, 20). Within-host genetic variation (iSNV) depends on intra-host virus evolution and transmission bottleneck size. To determine the baseline similarity of within-host genetic diversity, we prepared two sets of samples as controls: (a) six samples were sequenced in duplicate to account for uncertainty arising from sequencing; and (b) twenty-one samples collected from ten individuals. To examine the dynamics of mutations related to transmission events, we identified 13 transmission pairs (donor and recipient) that were directly linked with symptom onset varying by 1 to 7 days.

Single nucleotide variants (SNVs) in deep-sequence data were identified using three different variant callers, freebayes (v.1.3.2) (36), VarDict (v.1.82) (37) and LoFreq (v.2.15) (38). To attain a robust variant calling result, only SNVs detected by at least two different variant callers were analyzed in this study (8). SNVs with a minimum depth of 100 reads, minimum frequency of 3%, and detected by at least two different variant callers were retained for further analysis. Parameters and scripts for this pipeline are described in <https://github.com/hku-sph-covid-19-genomics-consortium/hk-sars-cov-2-genomic-epidemiology>. Gene annotations of the SNVs were based on **table S10**. To understand the uncertainty in iSNV due to the sequencing protocol, we sequenced six samples in duplicate. While detection of major variants (consensus) was consistent, detection of iSNVs may vary between sequencing runs. For example, while iSNVs of case 10 were shared between sequencing runs, iSNVs of case 15 were mutually exclusive (**fig. S7**). Similarly, when comparing iSNV of 21 samples collected from 10 individuals, major variants in samples from the same patient remained identical but their iSNVs varied. A similar pattern was observed in transmission pairs, where most of the major variants are shared but some of the minor variants are unique (**Fig. 4A**), which can be explained by a narrow transmission bottleneck.

The statistical framework for estimating the transmission bottleneck size between identified transmission pairs was introduced in (18). It was based on a beta-binomial method which models the number of transmitted virions from donor to the recipient. Because of the high sequencing depth of the data, the minimum variant calling threshold was set to 0.03 with a minimum depth of 100 reads. Bottleneck size estimates were calculated by maximum likelihood analysis comparing the allele frequency of variants passing threshold between samples. The 95% confidence intervals were calculated using a likelihood ratio test. To identify similarity of SNVs between samples we used the Jaccard distance, defined as one minus the proportion of intersection between two samples divided by the proportion of their union.

$$Jaccard(A, B) = 1 - \frac{|A \cap B|}{|A \cup B|}$$

SARS-Cov-2 sequences from Hong Kong contained within-patient variation in 12,859 sites of the genome when compared to the SARS-CoV-2 reference strain Wuhan-Hu-1 (GenBank: MN908947.3). 37.2% of the sites ( $n=4,779$ ) contained mutations in more than one sample. High frequency of variation (in  $>100$  Hong Kong sequences) was observed in 30 sites (**table S6**). The spectrum of allele frequencies (**fig. S8**) showed that over 90% of the variants had allele frequency  $\geq 95\%$  or  $\leq 10\%$ . Mutation hotspots were detected in four sites of the genome with a greater frequency of intra-host single nucleotide variation (iSNVs). These mutations were sporadically distributed across the phylogeny and present in  $\sim 20$  sequences from the GISAID data, which may suggest potential homoplasy. We observed two variants unique to Hong Kong, C5812T and G25785T, which were detected in separate phylogenetic clusters of local Hong Kong cases. The C5812T mutation was identified in two separate clusters in the fourth wave. While the C5812T mutation in one cluster likely descended from a local ancestral case, the mutation in the earlier cluster may have been imported. Similarly, G25785T was found in both the third and fourth waves, and mutations in at least one cluster likely originated from local cases. Some of the low frequency SNVs (frequency  $< 5\%$ , shown in the low peaks to the bottom of **fig. S8** and **table S7**) commonly occurred in global context. For example, the G28883C (G205R in nucleocapsid) and C22227T (A665V in spike) mutations were found in 38.09% and 21.49% of the global cases, however they were only seen in 1.56% and 0.7% of the Hong Kong cases respectively.

#### Estimation of the instantaneous effective reproductive number ( $R_t$ )

The instantaneous effective reproduction number  $R_t$  is defined as the average number of secondary cases generated by cases on day  $t$ . If  $R_t > 1$  the epidemic is expanding at time  $t$ , whereas  $R_t < 1$  indicates that the epidemic size is shrinking at time  $t$ . The transmissibility of imported and local cases was expected to be very different because intensive non-pharmaceutical interventions had been imposed on travelers arriving from COVID-19 affected regions since January 2020. Hence, we only included cases from the following three categories into the computation of  $R_t$ , i.e., local case and epidemiologically linked with local cases defined by the Centre for Health Protection (CHP, <https://www.coronavirus.gov.hk/eng/index.html>).

Since the epidemic curves provided by CHP were based on the dates of symptom onset or dates of confirmation, we used a deconvolution-based method to reconstruct the COVID-19 epidemic curves by dates of infection (39, 40). We assumed that the incubation period was Gamma with mean and standard deviation of 6.5 and 2.6 days (41), and that the distribution of the time between symptom onset and case confirmation was Gamma with mean and standard deviation of 4.3 and 3.2 days. For asymptomatic cases, we assumed they shared the same distribution of the time between infection and case confirmation with the symptomatic cases. We then computed  $R_t$  for local cases only from the respective epidemic curves using the “*EpiEstim*” (42) R package (**Fig. 3**).

#### Estimation of the relative reproductive number of HK-wave3 compared with HK-wave4A

We defined the comparative transmissibility of any two lineages as the relative reproductive number, i.e., the ratio of their basic reproductive numbers. We extended a previous competition transmission model (43, 44) of two viruses and applied the fitness inference framework to the sequence data collected in Hong Kong during the cocirculation period of HK-wave3 and HK-wave4A clades (between 19-September and 21-October-2020, **Fig. 3**). We assumed the two clades shared the same generation time distribution which can be approximated by the serial interval distribution estimated in Leung *et al.* (45) (i.e., Gamma distribution with

mean and standard deviation of 5.2 and 1.7 days). The inference framework incorporates both incidence and genotype frequency data that reflect the local comparative transmissibility of cocirculating lineages.

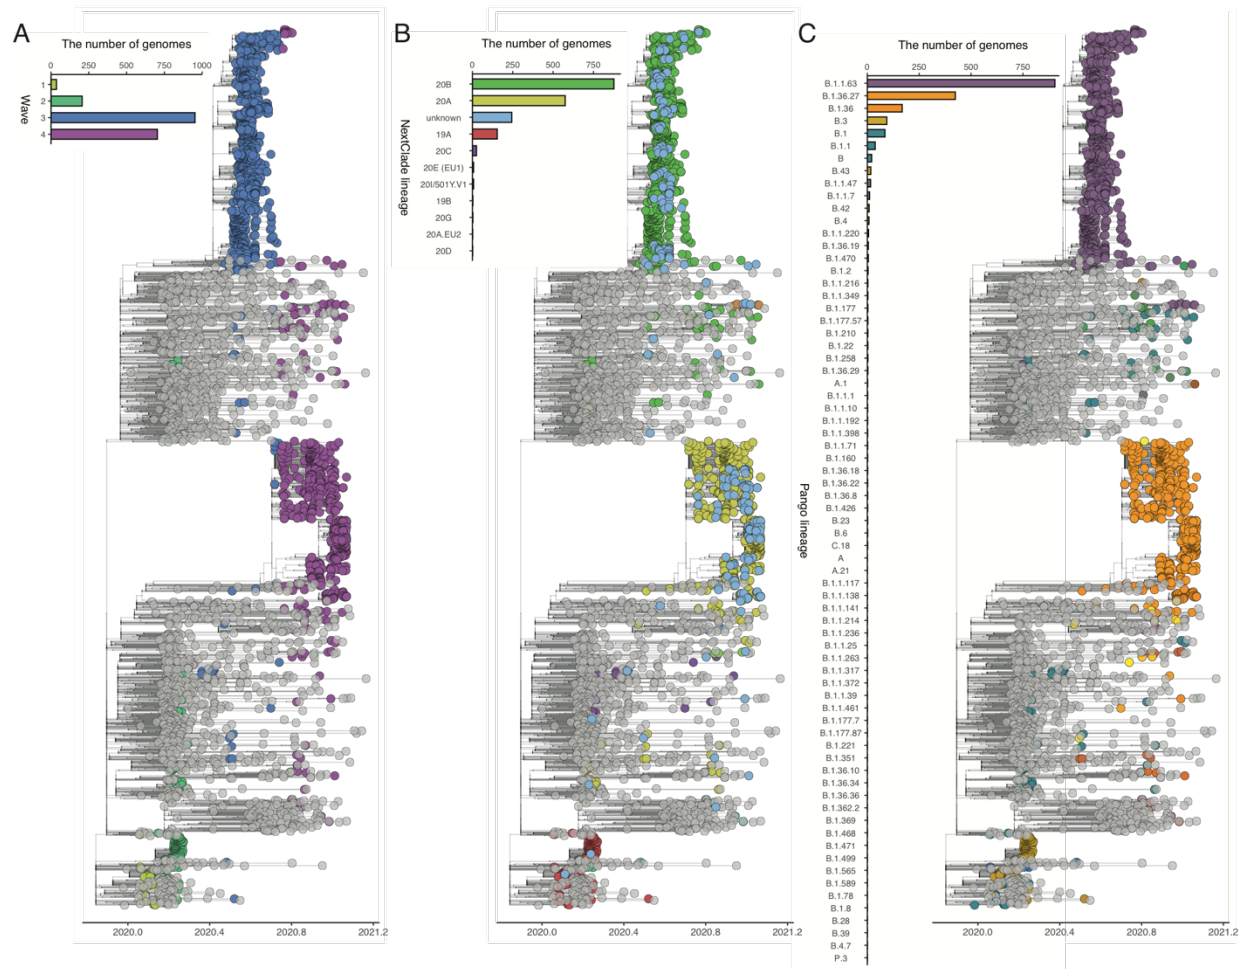

**Fig. S1.**

Time-scaled maximum-likelihood phylogeny of SARS-CoV2 using IQ-TREE (v.2) (26). The tree colored by (A) pandemic waves in Hong Kong, (B) Nextclade, and (C) PANGO classification, respectively. Global sequences are shown in grey.

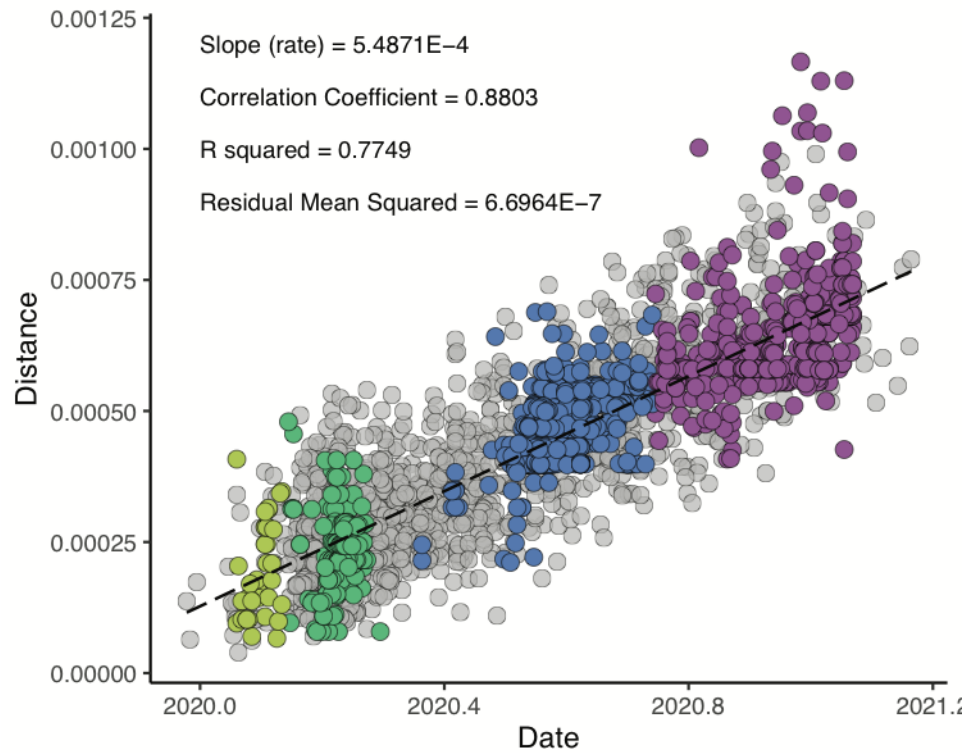

**Fig. S2.**

Root-to-tip regression analysis was performed in TempEst v.1.5.3 (25). Colours indicate pandemic waves in Hong Kong as in **fig. S1 (A)**.

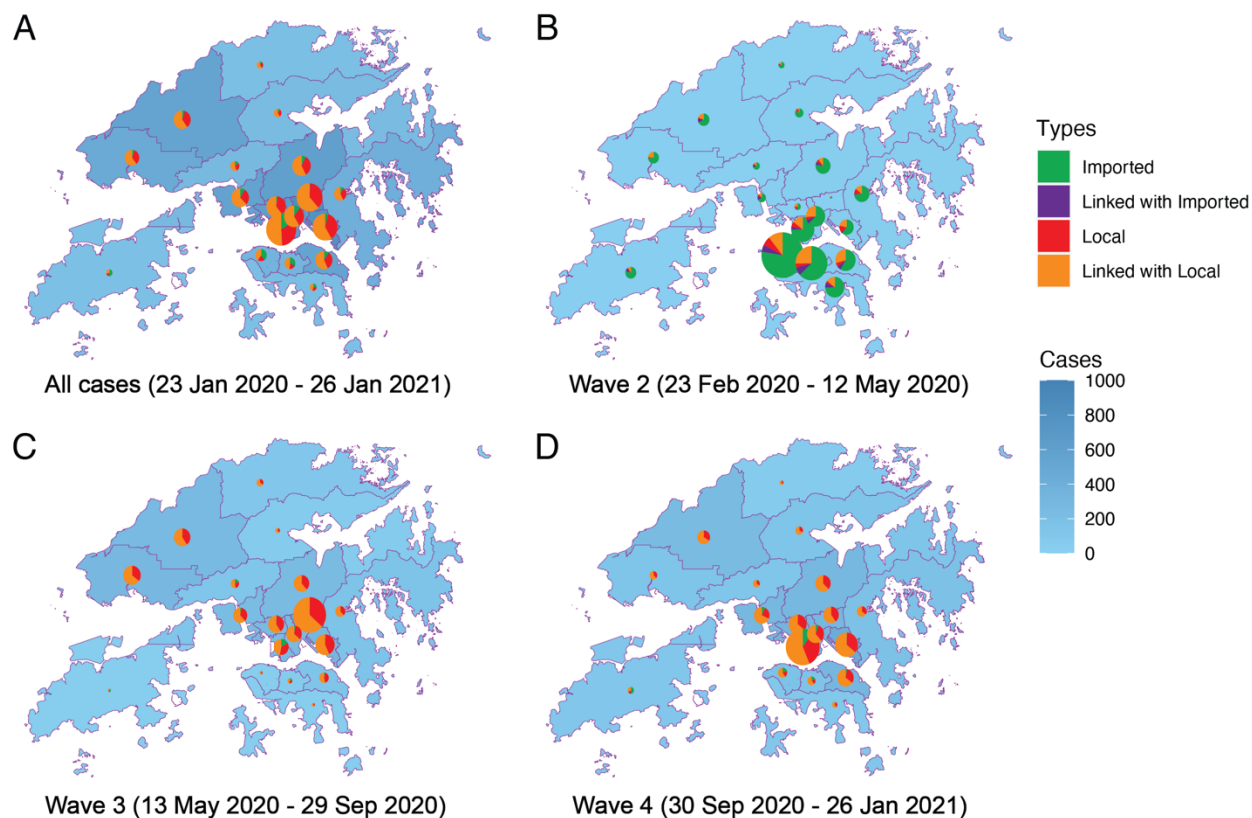

**Fig. S3.**

Geography of SARS-CoV-2 cases in Hong Kong. (A) Map of Hong Kong's 18 districts shaded by the number of laboratory-confirmed cases of SARS-CoV-2. Pie charts divided by transmission types. Pie chart size reflects the number of laboratory-confirmed cases in this district (ratio of cases and radius: 1/50,000). (B) same as (A) based on second wave (ratio of cases and radius in pie charts: 1/5,000). (C) same as (A) based on third wave (ratio of cases and radius in pie charts: 1/25,000). (D) same as (A) based on fourth wave (ratio of cases and radius in pie charts: 1/30,000).



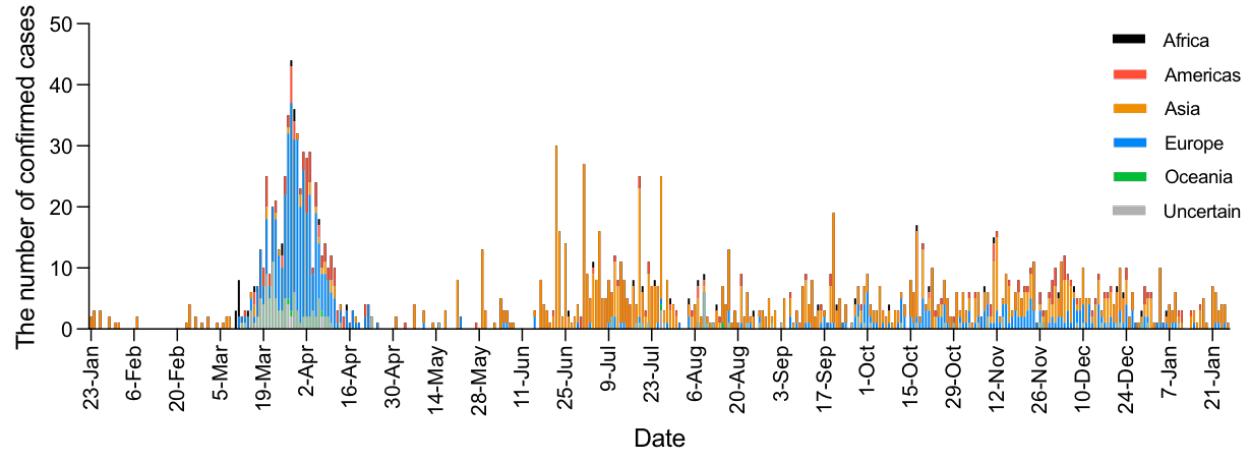

**Fig. S4.**  
SARS-CoV-2 imported cases colored by continent of origin.

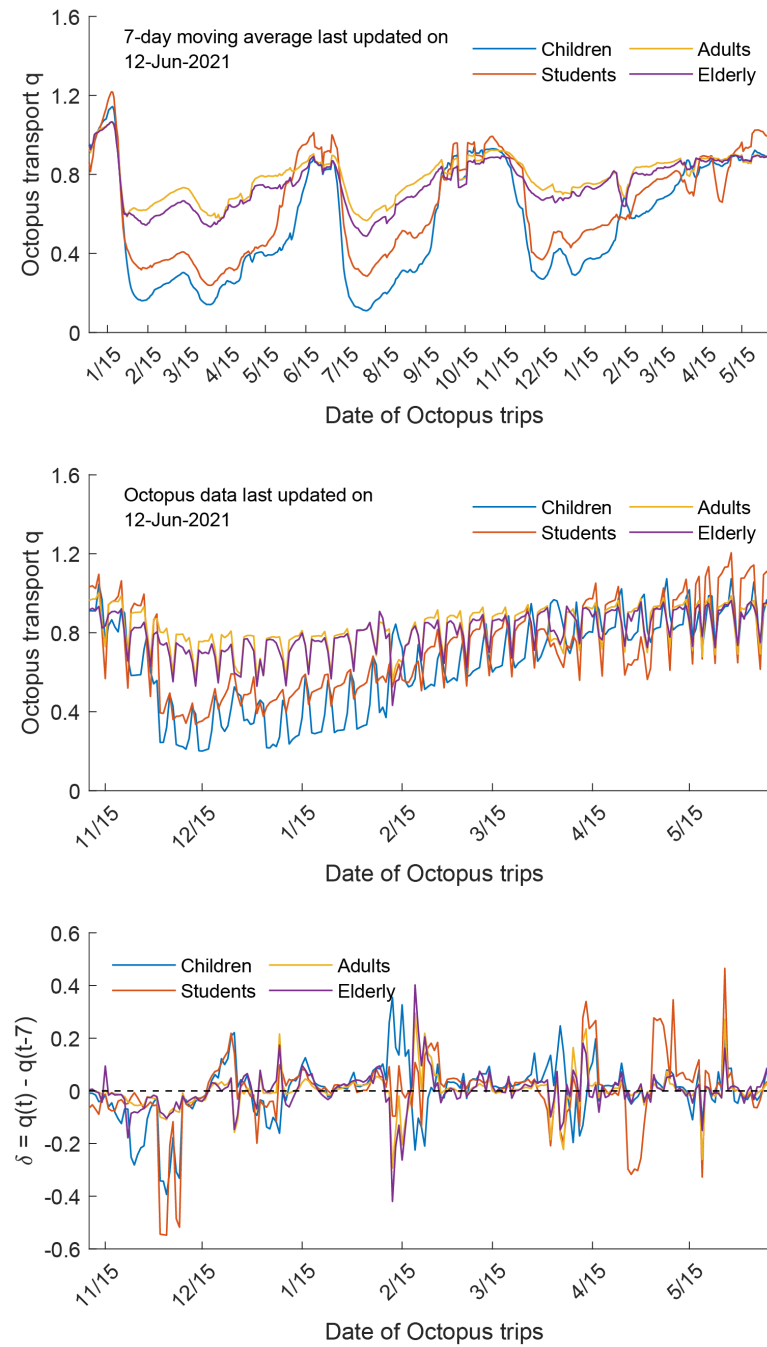

**Fig. S5.** Octopus mobility data during pre-pandemic period and early period of wave four in Hong Kong.

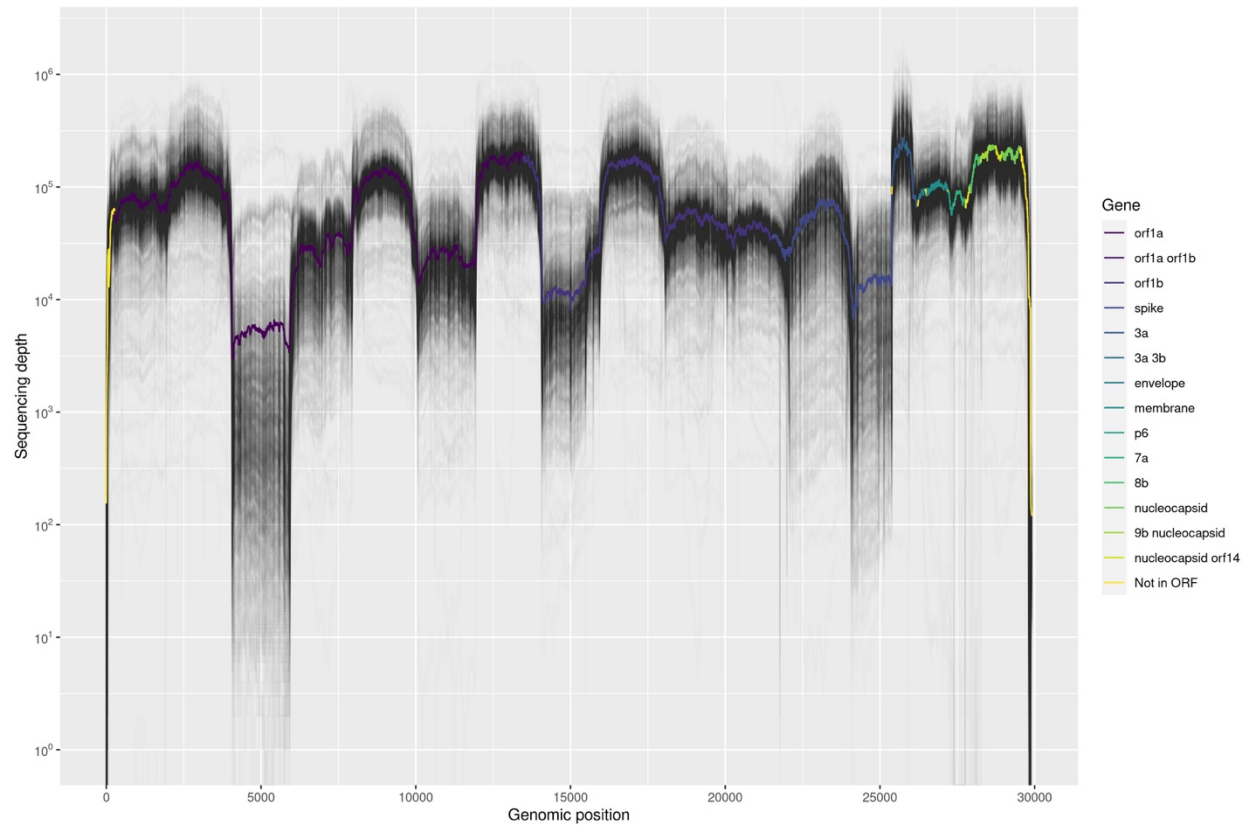

**Fig. S6.** Sequencing depth of NGS data across the genome. The colored line represents the average read depth at each genomic position.

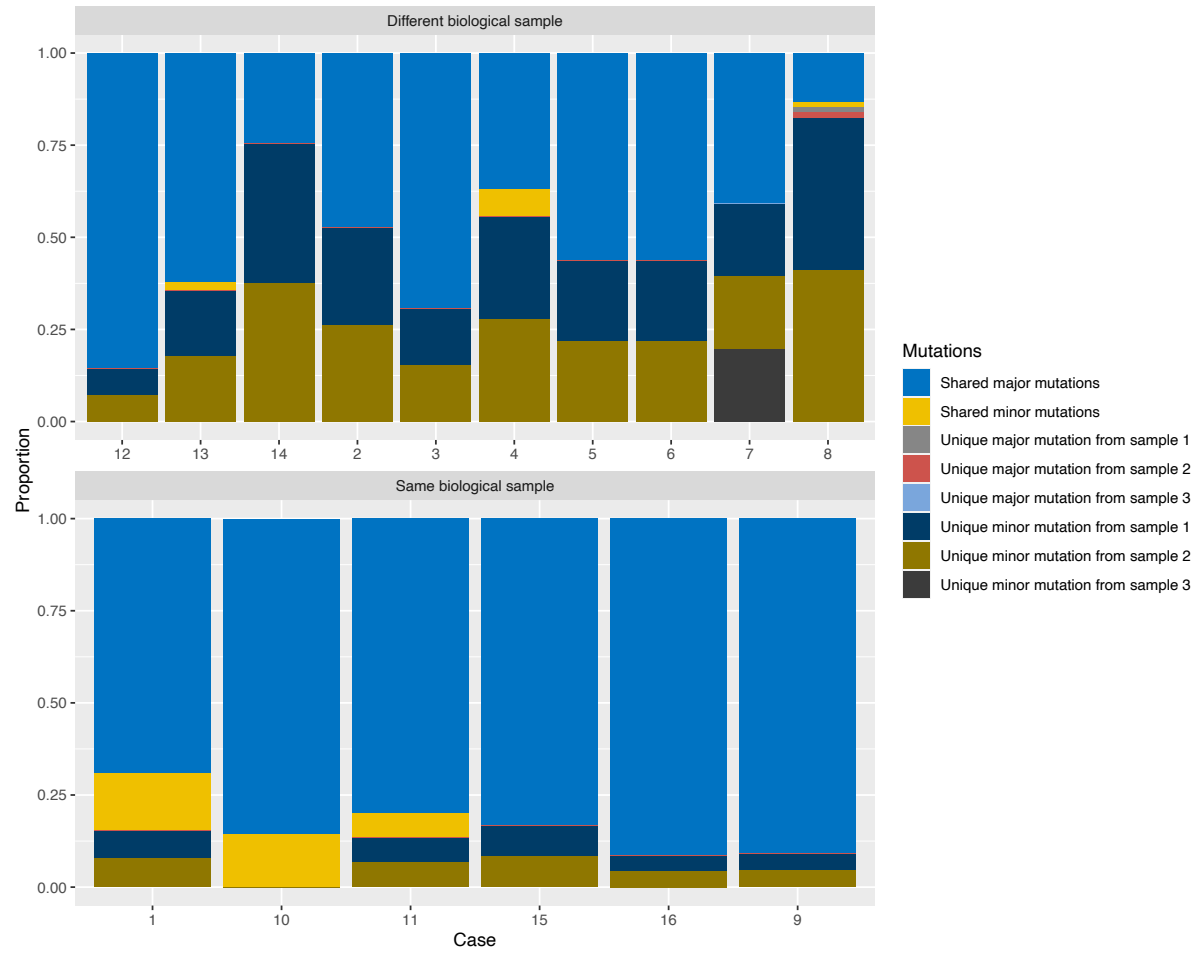

**Fig. S7.** Proportion of shared mutations between samples from same individuals.

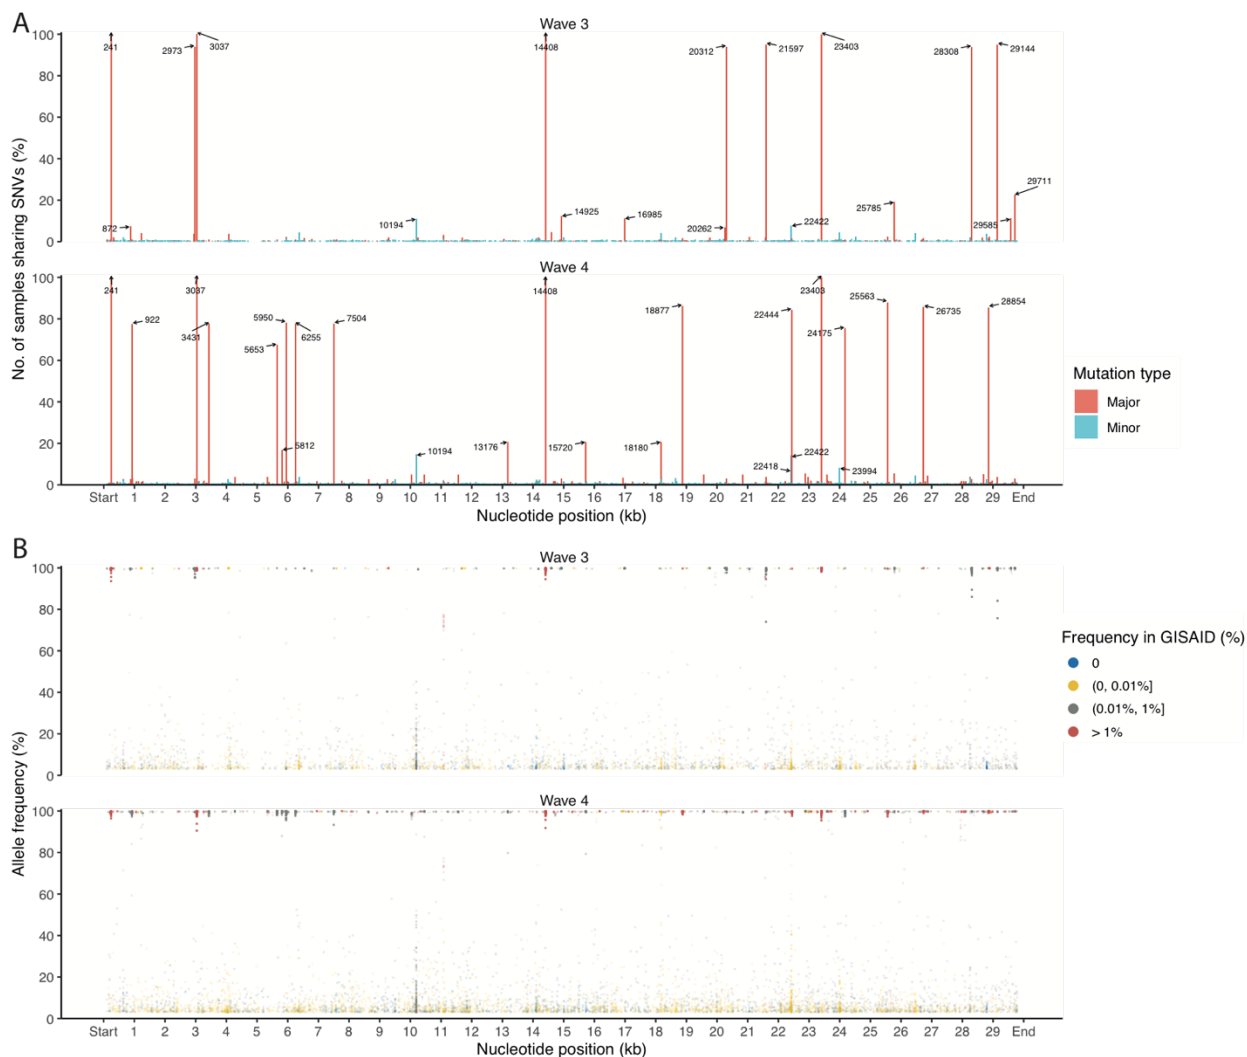

**Fig. S8.**

Frequencies and dynamics of SNVs in Hong Kong. **(A)** Percentage of samples that share mutations in third and fourth wave epidemics. The color codes for major and minor mutations at different genomic sites. High-frequency variant sites ( $n = 36$ , identified in at least 5% of the respective samples) are labeled. **(B)** Relative mutation frequency (allele frequency) of SNVs. The SNVs are colored by the frequencies of mutations reported in GISAID dataset.

**Table S1.**  
Cases and genome sequences from waves of SARS-CoV-2 in Hong Kong.

| Wave           | Duration              | Peak of wave (no. of cases on peak day) | Travel-related cases <sup>b</sup> | Community cases <sup>c</sup> | Total confirmed cases | Genomes sequenced | Changes in stringency <sup>d</sup> |
|----------------|-----------------------|-----------------------------------------|-----------------------------------|------------------------------|-----------------------|-------------------|------------------------------------|
| 1              | 23-Jan to 22-Feb      | 9-Feb (10 cases)                        | 17                                | 53                           | 70                    | 36                | 1-2-3                              |
| 2              | 23-Feb to 12-May      | 27-Mar (65 cases)                       | 705                               | 273                          | 978                   | 206               | 3-2-3-4                            |
| 3              | 13-May to 29-Sep      | 30-Jul (149 cases)                      | 647                               | 3385                         | 4032                  | 953               | 4-3-2-4-3                          |
| 4 <sup>a</sup> | 30-Sep to 26-Jan 2021 | 29-Nov (115 cases)                      | 629                               | 4515                         | 5144                  | 704               | 3-4-5                              |

<sup>a</sup>wave four is summarized until 26 Jan 2021 for this study. <sup>b</sup> imported cases only. <sup>c</sup> epidemiologically linked with imported cases, local cases, and epidemiologically linked with local cases. <sup>d</sup>A-B denotes the stringency index level (based on Oxford COVID-19 Government Response Tracker, See Methods) change from A to B (e.g., 1-2-3 means that the stringency index level was increased from 1 to 2 to 3).

**Table S2.**  
Genome sequencing and population statistics of Hong Kong districts.

| Districts           | SARS-COV-2 sample size <sup>a</sup> | Sequenced <sup>b</sup> | Latitude <sup>c</sup> | Longitude <sup>c</sup> | Population size <sup>d</sup> | Population density <sup>d</sup> (people per km <sup>2</sup> ) | Median monthly household income <sup>d</sup> (HK\$) |
|---------------------|-------------------------------------|------------------------|-----------------------|------------------------|------------------------------|---------------------------------------------------------------|-----------------------------------------------------|
| Central and Western | 365                                 | 58                     | 22.282150             | 114.156880             | 240,500                      | 19,171                                                        | 41,400                                              |
| Eastern             | 548                                 | 81                     | 22.284030             | 114.224220             | 545,600                      | 30,336                                                        | 34,300                                              |
| Southern            | 219                                 | 42                     | 22.246760             | 114.174134             | 264,600                      | 6,812                                                         | 32,800                                              |
| Wan Chai            | 348                                 | 76                     | 22.279680             | 114.171680             | 178,400                      | 16,973                                                        | 44,100                                              |
| Sham Shui Po        | 626                                 | 126                    | 22.330700             | 114.162163             | 416,500                      | 44,517                                                        | 24,300                                              |
| Kowloon City        | 646                                 | 140                    | 22.328290             | 114.191490             | 419,900                      | 41,919                                                        | 30,000                                              |
| Kwun Tong           | 804                                 | 153                    | 22.313260             | 114.225810             | 688,500                      | 61,075                                                        | 22,500                                              |
| Wong Tai Sin        | 841                                 | 132                    | 22.342140             | 114.195830             | 416,100                      | 44,729                                                        | 25,500                                              |
| Yau Tsim Mong       | 977                                 | 216                    | 22.321320             | 114.172580             | 329,900                      | 47,177                                                        | 30,000                                              |
| Islands             | 203                                 | 38                     | 22.210370             | 114.028800             | 186,500                      | 1,054                                                         | 28,400                                              |
| Kwai Tsing          | 566                                 | 124                    | 22.354880             | 114.084010             | 502,400                      | 21,528                                                        | 24,700                                              |
| North               | 207                                 | 43                     | 22.494711             | 114.138123             | 314,100                      | 2,301                                                         | 30,400                                              |
| Sai Kung            | 400                                 | 78                     | 22.381540             | 114.270393             | 472,500                      | 3,645                                                         | 36,500                                              |
| Sha Tin             | 601                                 | 99                     | 22.387159             | 114.195229             | 688,100                      | 10,014                                                        | 29,700                                              |
| Tai Po              | 246                                 | 50                     | 22.450840             | 114.164223             | 306,800                      | 2,254                                                         | 25,800                                              |
| Tsuen Wan           | 288                                 | 66                     | 22.374630             | 114.115097             | 311,800                      | 5,034                                                         | 32,600                                              |
| Tuen Mun            | 473                                 | 127                    | 22.396910             | 113.974411             | 495,100                      | 5,964                                                         | 25,000                                              |
| Yuen Long           | 553                                 | 134                    | 22.445570             | 114.022293             | 645,000                      | 4,711                                                         | 27,000                                              |

<sup>a</sup> There are 1313 cases that have unknown location information. <sup>b</sup> There are 116 genomes that have unknown location information. <sup>c</sup> Data from <https://www.latlong.net/>. <sup>d</sup> Data from the Census and Statistics Department (Hong Kong) in 2019.

**Table S3.**

Travel related cases and epidemiologically linked with imported cases within seven Hong Kong monophyletic clades (over 10 community cases).

| The number of samples within lineage | Travel related case ID | Report date | District            | Origin <sup>a</sup>      |
|--------------------------------------|------------------------|-------------|---------------------|--------------------------|
| 902                                  | 349                    | 2020-07-15  | Unknown             | Philippines              |
|                                      | 1156                   | 2020-09-11  | Unknown             | Philippines              |
|                                      | 783                    | 2020-08-02  | Eastern             | Philippines              |
| 552                                  | 1180                   | 2020-09-20  | Kowloon City        | Nepal                    |
|                                      | 1182                   | 2020-09-20  | Yau Tsim Mong       | Nepal                    |
|                                      | 1209                   | 2020-10-05  | Yau Tsim Mong       | Nepal                    |
|                                      | 1183                   | 2020-09-20  | Yau Tsim Mong       | Nepal                    |
|                                      | 1211                   | 2020-10-06  | Yau Tsim Mong       | Nepal                    |
|                                      | 1203                   | 2020-10-04  | Yau Tsim Mong       | Nepal                    |
|                                      | 1208                   | 2020-10-05  | Yau Tsim Mong       | Nepal                    |
|                                      | 1184                   | 2020-09-20  | Yau Tsim Mong       | Nepal                    |
|                                      | 1181                   | 2020-09-20  | Kowloon City        | Nepal                    |
| 92                                   | NA <sup>a</sup>        |             |                     |                          |
| 33                                   | 1596                   | 2020-12-24  | Central and Western | United Kingdom           |
|                                      | 1591                   | 2020-12-22  | Wan Chai            | United Kingdom           |
|                                      | 1592                   | 2020-12-23  | Yau Tsim Mong       | India                    |
|                                      | 1593                   | 2020-12-23  | Yau Tsim Mong       | India                    |
|                                      | 1590                   | 2020-12-22  | Wan Chai            | India                    |
|                                      | 1586                   | 2020-12-21  | NA                  | India                    |
| 29                                   | 84                     | 2020-03-21  | Yuen Long           | United Kingdom           |
|                                      | 91                     | 2020-03-22  | Tsuen Wan           | United Kingdom           |
|                                      | 81                     | 2020-03-20  | Eastern             | United Kingdom           |
|                                      | 68                     | 2020-03-18  | Shatin              | United Kingdom           |
|                                      | 78                     | 2020-03-20  | Eastern             | United Kingdom           |
|                                      | 111                    | 2020-03-24  | Central and Western | United Kingdom           |
|                                      | 93                     | 2020-03-22  | Eastern             | United Kingdom           |
|                                      | 92                     | 2020-03-22  | Eastern             | United Kingdom           |
|                                      | 77                     | 2020-03-20  | Kwai Tsing          | United Kingdom           |
|                                      | 71                     | 2020-03-20  | Central and Western | United Kingdom           |
|                                      | 90                     | 2020-03-22  | Tsuen Wan           | United Kingdom           |
|                                      | 82                     | 2020-03-20  | Shatin              | United Kingdom           |
|                                      | 83                     | 2020-03-21  | Yuen Long           | United Kingdom           |
| 19                                   | NA <sup>b</sup>        |             |                     |                          |
| 16                                   | 256                    | 2020-07-01  | Shatin              | United States of America |

<sup>a</sup> This result is based on epidemiological data. <sup>b</sup> No travel-related cases.



**Table S4.**

Distribution of PANGO lineages across HK-wave3 and HK-wave4A clades.

| <b>HK clade</b> | <b>PANGO lineage</b> | <b>Number of genomes</b> |
|-----------------|----------------------|--------------------------|
| HK-wave3        | B.1.1.63             | 888                      |
|                 | B.1.1                | 5                        |
|                 | B.1.1.220            | 6                        |
|                 | B.1.1.192            | 2                        |
|                 | B.1.1.398            | 1                        |
| HK-wave4A       | B.1.36.27            | 424                      |
|                 | B.1.36               | 124                      |
|                 | B.1.36.29            | 2                        |
|                 | B.1.36.10            | 1                        |
|                 | B.1.36.34            | 1                        |

**Table S5.**

Sample numbers associated with different transmission settings in HK-wave3, HK-wave4A and all community cases in wave3 and wave4 based on epidemiological data.

| <b>Transmission setting</b> | <b>Wave3 community cases (epidemiological data)</b> | <b>Wave4 community cases (epidemiological data)</b> | <b>HK-wave3 clade (sequenced data)</b> | <b>HK-wave4A clade (sequenced data)</b> |
|-----------------------------|-----------------------------------------------------|-----------------------------------------------------|----------------------------------------|-----------------------------------------|
| Social                      | 408                                                 | 802                                                 | 114                                    | 130                                     |
| Rche/Rchd <sup>a</sup>      | 145                                                 | 117                                                 | 47                                     | 4                                       |
| Family/Roommate             | 1800                                                | 2352                                                | 470                                    | 226                                     |
| Unknown/Sporadic            | 661                                                 | 763                                                 | 149                                    | 84                                      |
| Work                        | 354                                                 | 421                                                 | 118                                    | 81                                      |
| Nosocomial                  | 17                                                  | 60                                                  | 4                                      | 27                                      |

<sup>a</sup> Residential care homes for the elderly and disabled.

**Table S6.**  
Major SNVs identified in third and fourth waves in Hong Kong.

| Position | Wave       | Gene       | Synonymous mutation | Mutation at nucleotide | Mutation at amino acid | Number of samples with major SNVs | Number of samples with iSNVs | Frequency in GISAID | Proportion in GISAID (%) |
|----------|------------|------------|---------------------|------------------------|------------------------|-----------------------------------|------------------------------|---------------------|--------------------------|
| 241      | Wave 3 & 4 | Not in ORF | Not in ORF          | C241T                  | NA                     | 1598                              | 0                            | 377531              | 94.59                    |
| 3037     | Wave 3 & 4 | nsp3       | TRUE                | C3037T                 | F106F                  | 1600                              | 0                            | 381081              | 95.48                    |
| 10194    | Wave 3 & 4 | nsp5       | FALSE               | A10194T G              | E47V G                 | 2                                 | 392                          | 43                  | 0.01                     |
| 14408    | Wave 3 & 4 | nsp12_2    | FALSE               | C14408T                | P314L                  | 1595                              | 0                            | 380926              | 95.44                    |
| 22422    | Wave 3 & 4 | S          | FALSE               | A22422G T              | D287G V                | 5                                 | 322                          | 28                  | 0.01                     |
| 23403    | Wave 3 & 4 | S          | FALSE               | A23403G                | D614G                  | 1597                              | 0                            | 381443              | 95.57                    |
| 872      | Wave 3     | nsp2       | FALSE               | G872A T C              | D23N Y H               | 82                                | 4                            | 679                 | 0.17                     |
| 2973     | Wave 3     | nsp3       | FALSE               | C2973T                 | A85V                   | 859                               | 1                            | 1500                | 0.38                     |
| 14925    | Wave 3     | nsp12_2    | TRUE                | C14925T                | V486V                  | 128                               | 0                            | 849                 | 0.21                     |
| 16985    | Wave 3     | nsp13      | FALSE               | C16985T                | T250I                  | 98                                | 1                            | 141                 | 0.04                     |
| 20262    | Wave 3     | nsp15      | TRUE                | A20262G                | L214L                  | 60                                | 1                            | 522                 | 0.13                     |
| 20312    | Wave 3     | nsp15      | FALSE               | C20312T                | A231V                  | 859                               | 0                            | 148                 | 0.04                     |
| 21597    | Wave 3     | S          | FALSE               | C21597T                | S12F                   | 874                               | 1                            | 633                 | 0.16                     |
| 25785    | Wave 3     | ORF3a      | FALSE               | G25785T A              | W131C *                | 202                               | 8                            | 1864                | 0.47                     |
| 28308    | Wave 3     | N          | FALSE               | C28308G T              | A12G V                 | 857                               | 1                            | 160                 | 0.04                     |
| 29144    | Wave 3     | N          | TRUE                | C29144T                | L291L                  | 874                               | 0                            | 606                 | 0.15                     |
| 29585    | Wave 3     | ORF10      | FALSE               | C29585T                | P10S                   | 97                                | 2                            | 701                 | 0.18                     |
| 29711    | Wave 3     | Not in ORF | Not in ORF          | G29711T                | NA                     | 220                               | 0                            | 596                 | 0.15                     |
| 922      | Wave 4     | nsp2       | TRUE                | G922A                  | L39L                   | 549                               | 0                            | 223                 | 0.06                     |
| 3431     | Wave 4     | nsp3       | FALSE               | G3431T                 | V238L                  | 552                               | 0                            | 426                 | 0.11                     |
| 5653     | Wave 4     | nsp3       | TRUE                | T5653C                 | Y978Y                  | 479                               | 0                            | 109                 | 0.03                     |
| 5812     | Wave 4     | nsp3       | TRUE                | C5812T                 | D1031D                 | 117                               | 1                            | 903                 | 0.23                     |
| 5950     | Wave 4     | nsp3       | FALSE TRUE          | G5950T A               | K1077N K               | 1110                              | 12                           | 1175                | 0.29                     |
| 6255     | Wave 4     | nsp3       | FALSE               | C6255T                 | A1179V                 | 552                               | 0                            | 543                 | 0.14                     |
| 7504     | Wave 4     | nsp3       | TRUE                | C7504T                 | Y1595Y                 | 551                               | 0                            | 170                 | 0.04                     |
| 13176    | Wave 4     | nsp10      | FALSE               | C13176T                | T51I                   | 144                               | 0                            | 235                 | 0.06                     |
| 15720    | Wave 4     | nsp12_2    | TRUE                | C15720T                | D751D                  | 144                               | 3                            | 1377                | 0.35                     |
| 18180    | Wave 4     | nsp14      | TRUE                | G18180A                | K47K                   | 144                               | 0                            | 33                  | 0.01                     |
| 18877    | Wave 4     | nsp14      | TRUE                | C18877T                | L280L                  | 617                               | 1                            | 23681               | 5.93                     |
| 22418    | Wave 4     | S          | FALSE               | A22418G                | T286A                  | 1                                 | 76                           | 1                   | 0                        |
| 22444    | Wave 4     | S          | TRUE                | C22444T                | D294D                  | 603                               | 1                            | 7893                | 1.98                     |
| 23994    | Wave 4     | S          | FALSE               | A23994G                | K811R                  | 1                                 | 93                           | 9                   | 0                        |
| 24175    | Wave 4     | S          | TRUE                | T24175C                | A871A                  | 536                               | 0                            | 59                  | 0.01                     |
| 25563    | Wave 4     | ORF3a      | FALSE               | G25563C T              | Q57H                   | 631                               | 10                           | 89470               | 22.42                    |
| 26735    | Wave 4     | M          | TRUE                | C26735T                | Y71Y                   | 614                               | 1                            | 21029               | 5.27                     |
| 28854    | Wave 4     | N          | FALSE               | C28854T                | S194L                  | 611                               | 3                            | 23575               | 5.91                     |

**Table S7.**  
Minor SNVs identified in Hong Kong cases (frequency in GISAID  $\geq 1\%$ ).

| Position | Gene       | Frequency in HK | (%)  | Silent mutation | Frequency in GISAID | Frequency in GISAID (%) | Mutation (nucleotide) | Mutation (amino acid) |
|----------|------------|-----------------|------|-----------------|---------------------|-------------------------|-----------------------|-----------------------|
| 28883    | N          | 25              | 1.56 | FALSE           | 152044              | 38.09                   | G28883C               | G610R                 |
| 26801    | M          | 10              | 0.62 | TRUE            | 86175               | 21.59                   | C26801G T             | L279L                 |
| 22227    | S          | 11              | 0.69 | FALSE           | 85789               | 21.49                   | C22227T               | A665V                 |
| 21255    | nsp16      | 9               | 0.56 | TRUE            | 85524               | 21.43                   | G21255T C             | A597A                 |
| 6286     | nsp3       | 12              | 0.75 | TRUE            | 85407               | 21.4                    | C6286T                | T3567T                |
| 29645    | ORF10      | 10              | 0.62 | FALSE           | 85145               | 21.33                   | G29645T               | V88L                  |
| 28932    | N          | 9               | 0.56 | FALSE           | 85057               | 21.31                   | C28932A T             | A659D V               |
| 445      | nsp1       | 10              | 0.62 | TRUE            | 84963               | 21.29                   | T445C                 | V180V                 |
| 1059     | nsp2       | 13              | 0.81 | FALSE           | 59725               | 14.96                   | C1059T                | T254I                 |
| 27944    | ORF8       | 7               | 0.44 | TRUE            | 57276               | 14.35                   | C27944T               | H51H                  |
| 23604    | S          | 15              | 0.94 | FALSE           | 56514               | 14.16                   | C23604T G A           | P2042L R H            |
| 23063    | S          | 16              | 1    | FALSE           | 53756               | 13.47                   | A23063T G             | N1501Y D              |
| 5986     | nsp3       | 13              | 0.81 | TRUE            | 53506               | 13.41                   | C5986T                | F3267F                |
| 28977    | N          | 16              | 1    | FALSE           | 53437               | 13.39                   | C28977T               | S704F                 |
| 3267     | nsp3       | 18              | 1.12 | FALSE           | 52970               | 13.27                   | C3267T                | T548I                 |
| 14676    | nsp12_2    | 12              | 0.75 | TRUE            | 52930               | 13.26                   | C14676T               | P1209P                |
| 23709    | S          | 11              | 0.69 | FALSE           | 52646               | 13.19                   | C23709T               | T2147I                |
| 27972    | ORF8       | 12              | 0.75 | FALSE           | 52586               | 13.18                   | C27972T               | Q79*                  |
| 24914    | S          | 12              | 0.75 | FALSE           | 52551               | 13.17                   | G24914T C             | D3352Y H              |
| 15279    | nsp12_2    | 12              | 0.75 | TRUE            | 52500               | 13.15                   | C15279T               | H1812H                |
| 23271    | S          | 11              | 0.69 | FALSE           | 52472               | 13.15                   | C23271A               | A1709D                |
| 28048    | ORF8       | 12              | 0.75 | FALSE           | 52430               | 13.14                   | G28048A T             | R155K I               |
| 24506    | S          | 11              | 0.69 | FALSE           | 52370               | 13.12                   | T24506G               | S2944A                |
| 16176    | nsp12_2    | 12              | 0.75 | TRUE            | 52366               | 13.12                   | T16176C               | T2709T                |
| 28111    | ORF8       | 10              | 0.62 | FALSE           | 52347               | 13.12                   | A28111G               | Y218C                 |
| 6954     | nsp3       | 11              | 0.69 | FALSE           | 52344               | 13.11                   | T6954C                | I4235T                |
| 5388     | nsp3       | 7               | 0.44 | FALSE           | 52288               | 13.1                    | C5388A                | A2669D                |
| 913      | nsp2       | 14              | 0.87 | TRUE            | 52196               | 13.08                   | C913T                 | S108S                 |
| 204      | Not in ORF | 5               | 0.31 | Not in ORF      | 47971               | 12.02                   | G204T A               | NA                    |
| 21614    | S          | 4               | 0.25 | FALSE           | 39312               | 9.85                    | C21614T               | L52F                  |
| 20268    | nsp15      | 7               | 0.44 | TRUE            | 26684               | 6.69                    | A20268G               | L648L                 |
| 27964    | ORF8       | 6               | 0.37 | FALSE           | 24942               | 6.25                    | C27964T               | S71L                  |
| 28869    | N          | 7               | 0.44 | FALSE           | 23983               | 6.01                    | C28869T               | P596L                 |
| 313      | nsp1       | 24              | 1.5  | TRUE            | 21829               | 5.47                    | C313T                 | L48L                  |
| 22992    | S          | 9               | 0.56 | FALSE           | 21826               | 5.47                    | G22992C A T           | S1430T N I            |
| 10319    | nsp5       | 6               | 0.37 | FALSE           | 20462               | 5.13                    | C10319T A             | L265F I               |
| 11083    | nsp6       | 38              | 2.37 | FALSE TRUE      | 20168               | 5.05                    | G11083T A             | L111F L               |
| 17615    | nsp13      | 9               | 0.56 | FALSE           | 19741               | 4.95                    | A17615G               | K1379R                |
| 28975    | N          | 5               | 0.31 | FALSE           | 19390               | 4.86                    | G28975C T A           | M702I                 |
| 21304    | nsp16      | 6               | 0.37 | FALSE           | 18702               | 4.69                    | C21304T               | R646C                 |
| 18424    | nsp14      | 4               | 0.25 | FALSE           | 17916               | 4.49                    | A18424G               | N385D                 |
| 25907    | ORF3a      | 4               | 0.25 | FALSE           | 17673               | 4.43                    | G25907T               | G515V                 |
| 28472    | N          | 4               | 0.25 | FALSE           | 17473               | 4.38                    | C28472T               | P199S                 |
| 14805    | nsp12_2    | 4               | 0.25 | TRUE            | 14592               | 3.66                    | C14805T               | Y1338Y                |
| 4543     | nsp3       | 5               | 0.31 | TRUE            | 11630               | 2.91                    | C4543T                | T1824T                |
| 25710    | ORF3a      | 3               | 0.19 | TRUE            | 11496               | 2.88                    | C25710T               | L318L                 |
| 15766    | nsp12_2    | 2               | 0.12 | FALSE           | 11473               | 2.87                    | G15766T               | V2299L                |
| 17019    | nsp13      | 5               | 0.31 | FALSE TRUE      | 11208               | 2.81                    | G17019T A             | E783D E               |
| 9526     | nsp4       | 4               | 0.25 | FALSE           | 11146               | 2.79                    | G9526T C              | M972I                 |
| 13993    | nsp12_2    | 2               | 0.12 | FALSE           | 11064               | 2.77                    | G13993T               | A526S                 |
| 11497    | nsp6       | 2               | 0.12 | TRUE            | 11042               | 2.77                    | C11497T               | Y525Y                 |

|       |            |    |      |            |       |      |             |          |
|-------|------------|----|------|------------|-------|------|-------------|----------|
| 26876 | M          | 2  | 0.12 | TRUE       | 10983 | 2.75 | T26876C     | I354I    |
| 16889 | nsp13      | 2  | 0.12 | FALSE      | 10934 | 2.74 | A16889G     | K653R    |
| 29399 | N          | 2  | 0.12 | FALSE      | 10916 | 2.73 | G29399A     | A1126T   |
| 23401 | S          | 3  | 0.19 | FALSE      | 10620 | 2.66 | G23401T     | Q1839H   |
| 5629  | nsp3       | 2  | 0.12 | TRUE       | 10398 | 2.61 | G5629T      | T2910T   |
| 15324 | nsp12_2    | 4  | 0.25 | TRUE       | 10168 | 2.55 | C15324T     | N1857N   |
| 29734 | Not in ORF | 5  | 0.31 | Not in ORF | 9939  | 2.49 | G29734T C   | NA       |
| 222   | Not in ORF | 2  | 0.12 | Not in ORF | 9834  | 2.46 | C222T       | NA       |
| 17104 | nsp13      | 5  | 0.31 | FALSE      | 8996  | 2.25 | C17104T     | H868Y    |
| 22879 | S          | 3  | 0.19 | FALSE      | 8965  | 2.25 | C22879A     | N1317K   |
| 29366 | N          | 3  | 0.19 | FALSE      | 8923  | 2.24 | C29366T     | P1093S   |
| 7767  | nsp3       | 12 | 0.75 | FALSE      | 8618  | 2.16 | T7767C      | I5048T   |
| 8047  | nsp3       | 3  | 0.19 | TRUE       | 8583  | 2.15 | C8047T      | Y5328Y   |
| 8083  | nsp3       | 5  | 0.31 | FALSE      | 8156  | 2.04 | G8083A      | M5364I   |
| 20661 | nsp16      | 3  | 0.19 | TRUE       | 8129  | 2.04 | T20661C     | S3S      |
| 29402 | N          | 10 | 0.62 | FALSE      | 7511  | 1.88 | G29402T C   | D1129Y H |
| 27800 | ORF7b      | 3  | 0.19 | TRUE       | 7440  | 1.86 | C27800A     | A39A     |
| 28725 | N          | 3  | 0.19 | FALSE      | 7311  | 1.83 | C28725T     | P452L    |
| 9286  | nsp4       | 17 | 1.06 | TRUE       | 7271  | 1.82 | C9286T      | N732N    |
| 10097 | nsp5       | 6  | 0.37 | FALSE      | 6822  | 1.71 | G10097A T C | G43S C R |
| 18028 | nsp13      | 6  | 0.37 | FALSE      | 6674  | 1.67 | G18028T     | A1792S   |
| 21855 | S          | 5  | 0.31 | FALSE      | 6653  | 1.67 | C21855T     | S293F    |
| 21575 | S          | 25 | 1.56 | FALSE      | 6592  | 1.65 | C21575T     | L13F     |
| 12988 | nsp9       | 5  | 0.31 | FALSE      | 6563  | 1.64 | G12988T C   | M303I    |
| 26972 | M          | 3  | 0.19 | TRUE       | 6559  | 1.64 | T26972C     | R450R    |
| 15598 | nsp12_2    | 3  | 0.19 | FALSE      | 6554  | 1.64 | G15598A     | V2131I   |
| 24910 | S          | 5  | 0.31 | TRUE       | 6544  | 1.64 | T24910C G   | T3348T   |
| 2453  | nsp2       | 4  | 0.25 | FALSE      | 6270  | 1.57 | C2453T      | L1648F   |
| 28651 | N          | 4  | 0.25 | TRUE       | 6143  | 1.54 | C28651T     | N378N    |
| 28887 | N          | 8  | 0.5  | FALSE      | 6124  | 1.53 | C28887T     | T614I    |
| 19839 | nsp15      | 2  | 0.12 | TRUE       | 6093  | 1.53 | T19839C     | N219N    |
| 23731 | S          | 4  | 0.25 | TRUE       | 6068  | 1.52 | C23731T     | T2169T   |
| 10323 | nsp5       | 11 | 0.69 | FALSE      | 5911  | 1.48 | A10323G     | K269R    |
| 11396 | nsp6       | 3  | 0.19 | FALSE      | 5509  | 1.38 | C11396T     | L424F    |
| 2416  | nsp2       | 6  | 0.37 | TRUE       | 5362  | 1.34 | C2416T      | Y1611Y   |
| 10870 | nsp5       | 5  | 0.31 | TRUE       | 5156  | 1.29 | G10870T A   | L816L    |
| 9745  | nsp4       | 3  | 0.19 | TRUE       | 5069  | 1.27 | C9745T      | Y1191Y   |
| 20451 | nsp15      | 4  | 0.25 | TRUE       | 4978  | 1.25 | C20451T     | N831N    |
| 22346 | S          | 4  | 0.25 | FALSE      | 4665  | 1.17 | G22346T     | A784S    |
| 28087 | ORF8       | 2  | 0.12 | FALSE      | 4662  | 1.17 | C28087T     | A194V    |
| 26424 | E          | 7  | 0.44 | TRUE       | 4656  | 1.17 | T26424C     | S180S    |
| 8603  | nsp4       | 3  | 0.19 | FALSE      | 4626  | 1.16 | T8603C      | F49L     |
| 13536 | nsp12_2    | 3  | 0.19 | TRUE       | 4547  | 1.14 | C13536T     | Y69Y     |
| 15480 | nsp12_2    | 3  | 0.19 | TRUE       | 4530  | 1.13 | C15480A T   | T2013T   |
| 3177  | nsp3       | 3  | 0.19 | FALSE      | 4398  | 1.1  | C3177T      | P458L    |
| 8917  | nsp4       | 8  | 0.5  | TRUE       | 4375  | 1.1  | C8917T      | F363F    |
| 4002  | nsp3       | 4  | 0.25 | FALSE      | 4288  | 1.07 | C4002T      | T1283I   |
| 19524 | nsp14      | 3  | 0.19 | TRUE       | 4175  | 1.05 | C19524T     | L1485L   |
| 29179 | N          | 5  | 0.31 | TRUE       | 4162  | 1.04 | G29179T A C | P906P    |
| 25437 | ORF3a      | 4  | 0.25 | FALSE      | 4088  | 1.02 | G25437T     | L45F     |
| 22388 | S          | 2  | 0.12 | TRUE       | 4038  | 1.01 | C22388T     | L826L    |
| 28253 | ORF8       | 43 | 2.69 | TRUE       | 3982  | 1    | C28253T     | F360F    |

**Table S8.**  
Estimation on bottleneck size of transmission pairs.

| <b>Transmission pair</b> | <b>Variant calling threshold</b> | <b>Donor</b> | <b>Recipient</b> | <b>Bottleneck size</b> | <b>CI lower</b> | <b>CI upper</b> |
|--------------------------|----------------------------------|--------------|------------------|------------------------|-----------------|-----------------|
| Cluster_fam_1122         | 0.03                             | 8773         | 8772             | 3                      | 1               | 10              |
| Cluster_fam_1166         | 0.03                             | 9042         | 9041             | 2                      | 1               | 4               |
| Cluster_fam_197          | 0.03                             | 1905         | 2168             | 1                      | 0               | 9               |
| Cluster_fam_222          | 0.03                             | 2172         | 2317             | 1                      | 0               | 27              |
| Cluster_fam_293          | 0.03                             | 2735         | 2609             | 1                      | 0               | 202             |
| Cluster_fam_336          | 0.03                             | 2989         | 2962             | 1                      | 0               | 13              |
| Cluster_fam_509          | 0.03                             | 3970         | 3612             | 1                      | 0               | 22              |
| Cluster_fam_562          | 0.03                             | 4306         | 4307             | NA                     | NA              | NA              |
| Cluster_fam_718          | 0.03                             | 5399         | 5444             | 1                      | 0               | 13              |
| Cluster_fam_730          | 0.03                             | 5539         | 5577             | NA                     | NA              | NA              |
| Cluster_friends_25       | 0.03                             | 1839         | 2047             | 1                      | 0               | 10              |
| Cluster_roommate_08      | 0.03                             | 2721         | 2545             | 1                      | 0               | 5               |
| Cluster_roommate_21      | 0.03                             | 4075         | 4208             | 1                      | 0               | 4               |

**Table S9.**

Highly shared variant sites (allele frequency  $\geq 3\%$  and were found in  $>1\%$  of the HK samples) located within or related to PCR primer binding regions.

| <b>Position</b> | <b>Number of samples with SNV</b> | <b>Proportion in HK samples</b> |
|-----------------|-----------------------------------|---------------------------------|
| 1912            | 18                                | 0.01124297                      |
| 1947            | 551                               | 0.3441599                       |
| 15487           | 28                                | 0.01748907                      |
| 15489           | 1105                              | 0.69019363                      |
| 15494           | 1151                              | 0.71892567                      |
| 18100           | 347                               | 0.21673954                      |
| 24082           | 178                               | 0.11118051                      |
| 24091           | 860                               | 0.53716427                      |
| 26060           | 550                               | 0.34353529                      |
| 29799           | 21                                | 0.0131168                       |

**Table S10.**

Gene annotation of SARS-CoV-2 Genome (nucleotide positions base on reference sequence Wuhan-Hu-1, GenBank: MN908947.3).

| <b>Gene segment</b> | <b>Start</b> | <b>Stop</b> |
|---------------------|--------------|-------------|
| nsp1                | 266          | 805         |
| nsp2                | 806          | 2719        |
| nsp3                | 2720         | 8554        |
| nsp4                | 8555         | 10054       |
| nsp5                | 10055        | 10972       |
| nsp6                | 10973        | 11842       |
| nsp7                | 11843        | 12091       |
| nsp8                | 12092        | 12685       |
| nsp9                | 12686        | 13024       |
| nsp10               | 13025        | 13441       |
| nsp12_1             | 13442        | 13468       |
| nsp12_2             | 13468        | 16236       |
| nsp13               | 16237        | 18039       |
| nsp14               | 18040        | 19620       |
| nsp15               | 19621        | 20658       |
| nsp16               | 20659        | 21555       |
| S                   | 21563        | 25384       |
| ORF3a               | 25393        | 26220       |
| E                   | 26245        | 26472       |
| M                   | 26523        | 27191       |
| ORF6                | 27202        | 27387       |
| ORF7a               | 27394        | 27753       |
| ORF7b               | 27762        | 27887       |
| ORF8                | 27894        | 28259       |
| N                   | 28274        | 29533       |
| ORF10               | 29558        | 29674       |



**Data S1. (Data S1.csv)**

Origins of imported cases in Hong Kong.

**Data S2. (Data S2.csv)**

Sample list with waves, NextClade and PANGO lineage designations.

**Data S3. (Data S3.csv)**

Summary of Hong Kong monophyletic clades.

**Data S4. (Data S4.pdf)**

Acknowledgements to sequences obtained from GISAID (accessed on 11-June-2021).

## Supplementary references

22. T. H. C. Sit *et al.*, Infection of dogs with SARS-CoV-2. *Nature* **586**, 776-778 (2020).
23. M. Vasimuddin, S. Misra, H. Li, S. Aluru, in *2019 IEEE International Parallel and Distributed Processing Symposium (IPDPS)*. (2019), pp. 314-324.
24. H. Li, A statistical framework for SNP calling, mutation discovery, association mapping and population genetical parameter estimation from sequencing data. *Bioinformatics* **27**, 2987-2993 (2011).
25. A. Rambaut, T. T. Lam, L. Max Carvalho, O. G. Pybus, Exploring the temporal structure of heterochronous sequences using TempEst (formerly Path-O-Gen). *Virus Evol* **2**, vew007 (2016).
26. L. T. Nguyen, H. A. Schmidt, A. von Haeseler, B. Q. Minh, IQ-TREE: a fast and effective stochastic algorithm for estimating maximum-likelihood phylogenies. *Mol Biol Evol* **32**, 268-274 (2015).
27. T. H. To, M. Jung, S. Lycett, O. Gascuel, Fast Dating Using Least-Squares Criteria and Algorithms. *Syst Biol* **65**, 82-97 (2016).
28. L. du Plessis *et al.*, Establishment and lineage dynamics of the SARS-CoV-2 epidemic in the UK. *Science* **371**, 708-712 (2021).
29. S. Duchene *et al.*, Temporal signal and the phylodynamic threshold of SARS-CoV-2. *Virus Evol* **6**, veaa061 (2020).
30. A. J. Drummond, A. Rambaut, B. Shapiro, O. G. Pybus, Bayesian coalescent inference of past population dynamics from molecular sequences. *Mol Biol Evol* **22**, 1185-1192 (2005).
31. J. L. Geoghegan *et al.*, Genomic epidemiology reveals transmission patterns and dynamics of SARS-CoV-2 in Aotearoa New Zealand. *Nat Commun* **11**, 6351 (2020).
32. S. Y. Ho, S. Duchene, D. Duchene, Simulating and detecting autocorrelation of molecular evolutionary rates among lineages. *Mol Ecol Resour* **15**, 688-696 (2015).
33. R. Bouckaert *et al.*, BEAST 2.5: An advanced software platform for Bayesian evolutionary analysis. *PLoS Comput Biol* **15**, e1006650 (2019).
34. A. J. Drummond, S. Y. Ho, M. J. Phillips, A. Rambaut, Relaxed phylogenetics and dating with confidence. *Plos Biol* **4**, e88 (2006).
35. A. Rambaut, A. J. Drummond, D. Xie, G. Baele, M. A. Suchard, Posterior Summarization in Bayesian Phylogenetics Using Tracer 1.7. *Syst Biol* **67**, 901-904 (2018).
36. E. P. Garrison, G. Marth, Haplotype-based variant detection from short-read sequencing. *arXiv: Genomics*, (2012).
37. Z. Lai *et al.*, VarDict: a novel and versatile variant caller for next-generation sequencing in cancer research. *Nucleic Acids Res* **44**, e108 (2016).
38. A. Wilm *et al.*, LoFreq: a sequence-quality aware, ultra-sensitive variant caller for uncovering cell-population heterogeneity from high-throughput sequencing datasets. *Nucleic Acids Res* **40**, 11189-11201 (2012).
39. K. M. Gostic *et al.*, Practical considerations for measuring the effective reproductive number, Rt. *PLoS Comput Biol* **16**, e1008409 (2020).
40. J. T. Wu *et al.*, Nowcasting epidemics of novel pathogens: lessons from COVID-19. *Nat Med* **27**, 388-395 (2021).
41. J. A. Backer, D. Klinkenberg, J. Wallinga, Incubation period of 2019 novel coronavirus (2019-nCoV) infections among travellers from Wuhan, China, 20-28 January 2020. *Euro Surveill* **25**, (2020).

42. R. N. Thompson *et al.*, Improved inference of time-varying reproduction numbers during infectious disease outbreaks. *Epidemics* **29**, 100356 (2019).
43. K. Leung, M. Lipsitch, K. Y. Yuen, J. T. Wu, Monitoring the fitness of antiviral-resistant influenza strains during an epidemic: a mathematical modelling study. *Lancet Infect Dis* **17**, 339-347 (2017).
44. K. Leung, Y. Pei, G. M. Leung, T. T. Lam, J. T. Wu, Empirical transmission advantage of the D614G mutant strain of SARS-CoV-2. *medRxiv*, (2020).
45. K. Leung, J. T. Wu, D. Liu, G. M. Leung, First-wave COVID-19 transmissibility and severity in China outside Hubei after control measures, and second-wave scenario planning: a modelling impact assessment. *Lancet* **395**, 1382-1393 (2020).
